# Supplementary material for: Ultra-rare genetic variation in relapsing polychondritis: a whole-exome sequencing study
Source: HighWire-hosted journal article supplement (doi:10.1136/ard-2023-224732), 2023-11-02
Supplement: ard-2023-224732supp003_data_supplement.xlsx [file ard-2023-224732supp003_data_supplement.xlsx]

## Sheet: table_DCBLD2_variants
Variant ID	Transcript affected	Impact	GenomAD PopFreqMax	Allele frequence in cases (n=66)	Allele frequence in controls (n=2923)	CADD score	Collapsing model tested	RP cases not included in the collapsing analyses (n=23)
3:98530074:T:A	DCBLD2:NM_080927:exon12:c.A1540T:p.I514F	nonsynonymous_SNV	0	0.030303	0	24.4	Rare damaging, Ultra rare damaging
3:98531235:TG:T	DCBLD2:NM_080927:exon10:c.1303delC:p.Q435Nfs*8	frameshift_deletion	0	0.0151515	0	33	Rare damaging, Ultra rare damaging, PTV	0.0435 (1 first-degree relative)
3:98541120:C:A	DCBLD2:NM_080927:exon6:c.G782T:p.G261V	nonsynonymous_SNV	0	0.0151515	0	28.2	Rare damaging, Ultra rare damaging	0.0435 (1 first-degree relative)
3:98541153:A:T	DCBLD2:NM_080927:exon6:c.T749A:p.L250X	stopgain	0	0.0151515	0	40	Rare damaging, Ultra rare damaging, PTV
3:98526963:G:C	DCBLD2:NM_080927:exon13:c.C1632G:p.L544L	synonymous_SNV	0	0	0.000342114	9.861	Synonymous
3:98538136:G:C	DCBLD2:NM_080927:exon8:c.C997G:p.L333V	nonsynonymous_SNV	0	0	0.000342114	25.7	Rare damaging, Ultra rare damaging
3:98538223:C:G	DCBLD2:NM_080927:exon8:c.G910C:p.A304P	nonsynonymous_SNV	0	0	0.000342114	14.55	-
3:98541115:G:A	DCBLD2:NM_080927:exon6:c.C787T:p.P263S	nonsynonymous_SNV	0	0	0.000342114	20.7	Rare damaging
3:98518345:A:G	DCBLD2:NM_080927:exon16:c.T2199C:p.D733D	synonymous_SNV	8.971e-06	0	0.000342114	8.354	Synonymous
3:98538183:G:A	DCBLD2:NM_080927:exon8:c.C950T:p.T317I	nonsynonymous_SNV	8.972e-06	0	0.000342114	21	Rare damaging
3:98518513:A:G	DCBLD2:NM_080927:exon16:c.T2031C:p.Y677Y	synonymous_SNV	8.975e-06	0	0.000342114	8.571	Synonymous
3:98530128:G:A	DCBLD2:NM_080927:exon12:c.C1486T:p.R496C	nonsynonymous_SNV	8.986e-06	0	0.000342114	32	Rare damaging
3:98518530:T:C	DCBLD2:NM_080927:exon16:c.A2014G:p.I672V	nonsynonymous_SNV	3.249e-05	0	0.0102634	0.489	-
3:98536663:C:T	DCBLD2:NM_080927:exon9:c.G1162A:p.D388N	nonsynonymous_SNV	3.249e-05	0	0.00376326	26.1	Rare damaging
3:98518340:G:A	DCBLD2:NM_080927:exon16:c.C2204T:p.P735L	nonsynonymous_SNV	3.59e-05	0	0.000342114	28.9	Rare damaging
3:98518346:T:C	DCBLD2:NM_080927:exon16:c.A2198G:p.D733G	nonsynonymous_SNV	4.484e-05	0	0.00171057	28.4	Rare damaging
3:98541118:T:C	DCBLD2:NM_080927:exon6:c.A784G:p.I262V	nonsynonymous_SNV	4.485e-05	0	0.00171057	22.4	Rare damaging
3:98568344:G:A	DCBLD2:NM_080927:exon3:c.C532T:p.R178C	nonsynonymous_SNV	4.485e-05	0	0.000342114	25	Rare damaging
3:98538066:T:C	DCBLD2:NM_080927:exon8:c.A1067G:p.N356S	nonsynonymous_SNV	4.963e-05	0	0.00136846	23.2	Rare damaging
3:98518311:G:A	DCBLD2:NM_080927:exon16:c.C2233T:p.P745S	nonsynonymous_SNV	5.286e-05	0	0.000342114	17.25	-
3:98518525:C:T	DCBLD2:NM_080927:exon16:c.G2019A:p.T673T	synonymous_SNV	5.799e-05	0	0.000342114	3.009	Synonymous
3:98530160:C:T	DCBLD2:NM_080927:exon12:c.G1454A:p.R485H	nonsynonymous_SNV	6.588e-05	0	0.000684229	23	Rare damaging
3:98541149:G:A	DCBLD2:NM_080927:exon6:c.C753T:p.G251G	synonymous_SNV	6.66e-05	0	0.00102634	10.62	Synonymous
3:98538203:T:A	DCBLD2:NM_080927:exon8:c.A930T:p.A310A	synonymous_SNV	6.666e-05	0	0.000342114	12.53	Synonymous
3:98530132:T:C	DCBLD2:NM_080927:exon12:c.A1482G:p.Q494Q	synonymous_SNV	6.667e-05	0	0.00171057	9.994	Synonymous
3:98600507:G:T	DCBLD2:NM_080927:exon2:c.C310A:p.R104S	nonsynonymous_SNV	6.672e-05	0	0.000342114	22.9	Rare damaging
3:98536652:T:C	DCBLD2:NM_080927:exon9:c.A1173G:p.K391K	synonymous_SNV	7.167e-05	0	0.000342114	11.26	Synonymous
3:98541148:C:T	DCBLD2:NM_080927:exon6:c.G754A:p.G252S	nonsynonymous_SNV	7.169e-05	0	0.000342114	29	Rare damaging
3:98520449:C:T	DCBLD2:NM_080927:exon14:c.G1715A:p.R572Q	nonsynonymous_SNV	7.306e-05	0	0.000342114	32	Rare damaging
3:98541085:C:T	DCBLD2:NM_080927:exon6:c.G817A:p.V273I	nonsynonymous_SNV	7.731e-05	0	0.000342114	20.6	Rare damaging
3:98538119:C:T	DCBLD2:NM_080927:exon8:c.G1014A:p.P338P	synonymous_SNV	7.81e-05	0	0.000342114	9.696	Synonymous
3:98600444:A:C	DCBLD2:NM_080927:exon2:c.T373G:p.S125A	nonsynonymous_SNV	8.96e-05	0	0.000342114	21.1	Rare damaging
3:98538120:G:A	DCBLD2:NM_080927:exon8:c.C1013T:p.P338L	nonsynonymous_SNV	9.851e-05	0	0.000684229	20.2	Rare damaging
3:98538112:C:T	DCBLD2:NM_080927:exon8:c.G1021A:p.A341T	nonsynonymous_SNV	9.889e-05	0	0.000684229	24.9	Rare damaging
3:98526984:C:T	DCBLD2:NM_080927:exon13:c.G1611A:p.L537L	synonymous_SNV	0.0012	0	0.00102634	10.23	-
3:98541179:C:T	DCBLD2:NM_080927:exon6:c.G723A:p.V241V	synonymous_SNV	0.0031	0	0.00307903	11.06	-
3:98530317:G:T	DCBLD2:NM_080927:exon11:c.C1445A:p.A482D	nonsynonymous_SNV	0.0066	0	0.00102634	24.8	-
3:98530329:G:A	DCBLD2:NM_080927:exon11:c.C1433T:p.P478L	nonsynonymous_SNV	0.0066	0	0.00102634	16.72	-
3:98600385:T:C	DCBLD2:NM_080927:exon2:c.A432G:p.I144M	nonsynonymous_SNV	0.066	0.030303	0.0954499	24	-	0.087
3:98518339:C:T	DCBLD2:NM_080927:exon16:c.G2205A:p.P735P	synonymous_SNV	0.0702	0.0606061	0.146083	9.234	-	0.087
3:98518377:C:T	DCBLD2:NM_080927:exon16:c.G2167A:p.D723N	nonsynonymous_SNV	0.0896	0.030303	0.00136846	22.9	-
3:98519481:G:A	DCBLD2:NM_080927:exon15:c.C1800T:p.S600S	synonymous_SNV	0.2519	0.378788	0.301403	6.201	-	0.3043
3:98541116:G:A	DCBLD2:NM_080927:exon6:c.C786T:p.I262I	synonymous_SNV	0.7063	0.621212	0.555251	11.58	-	0.5652 (1 first-degree relative)
